# Supplementary material for: Enhancement of Immune Checkpoint Inhibitor-Mediated Anti-Cancer Immunity by Intranasal Treatment of Ecklonia cava Fucoidan against Metastatic Lung Cancer
Source: MDPI journal article supplement (doi:10.3390/ijms22179125), 2021-08-24
Supplement: s1 [file s1]

## Supplementary Material

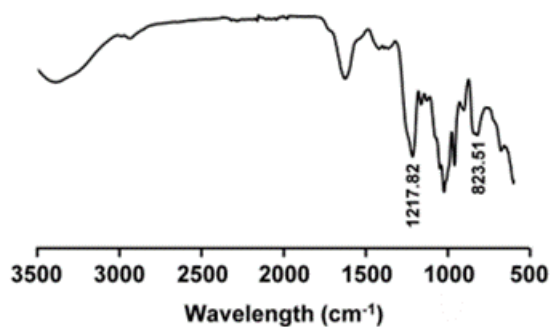

**Figure S1:** Fourier transform infrared spectrum of *Ecklonia cava*-extracted fucoidan (ECF).

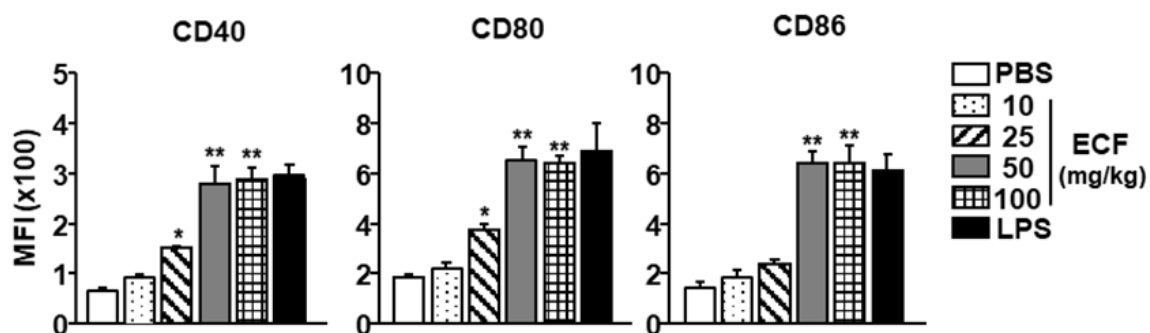

**Figure S2:** Dose dependent effect of ECF. C57BL/6 mice were injected intranasally with indicated dose of ECF. CD40, CD80, and CD86 expression levels in mediastinal lymph node (mLN) DCs were measured by flow cytometry 18 h after treatment ( $n = 6$ , two-way analysis of variance, \*\* $p < 0.01$ ).

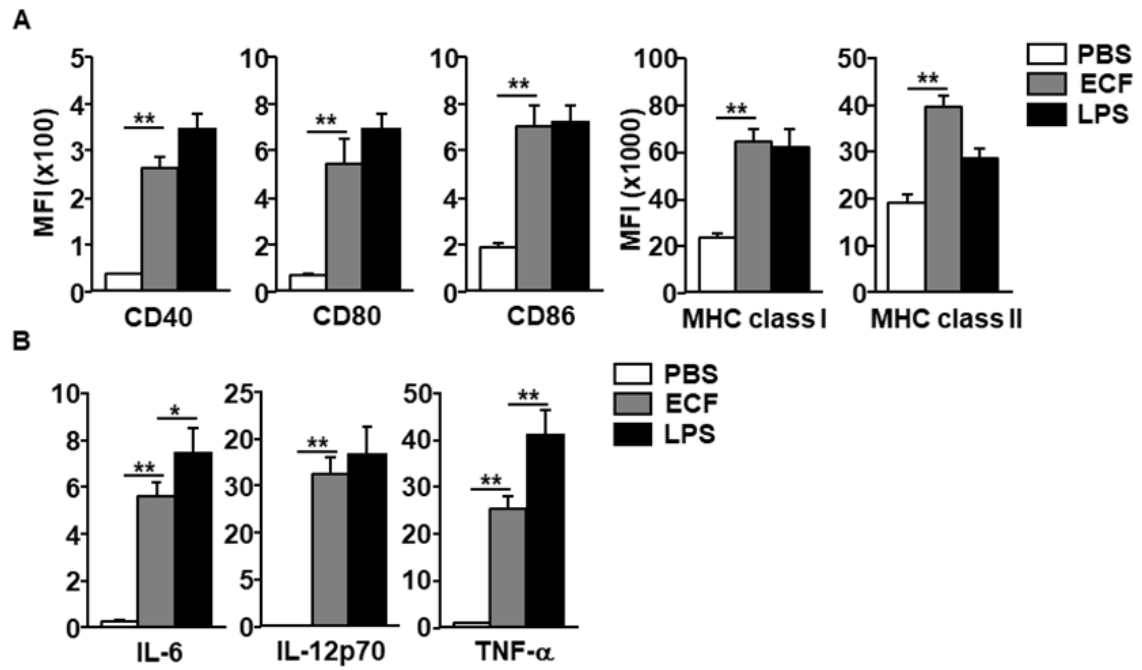

**Figure S3:** Intranasal injection of ECF activated mLN DCs in BALB/c mice. BALB/c mice were injected intranasally with 50 mg/kg of ECF. (A) CD40, CD80, CD86, MHC class I and II expression levels in mLN DCs were measured by flow cytometry 18 h after treatment ( $n = 6$ , two-way analysis of variance,  $**p < 0.01$ ). (B) The levels of cytokines in bronchoalveolar lavage (BAL) fluid were measured by flow cytometry 18 h after treatment ( $n = 6$ , two-way analysis of variance,  $*p < 0.05$  and  $**p < 0.01$ ).

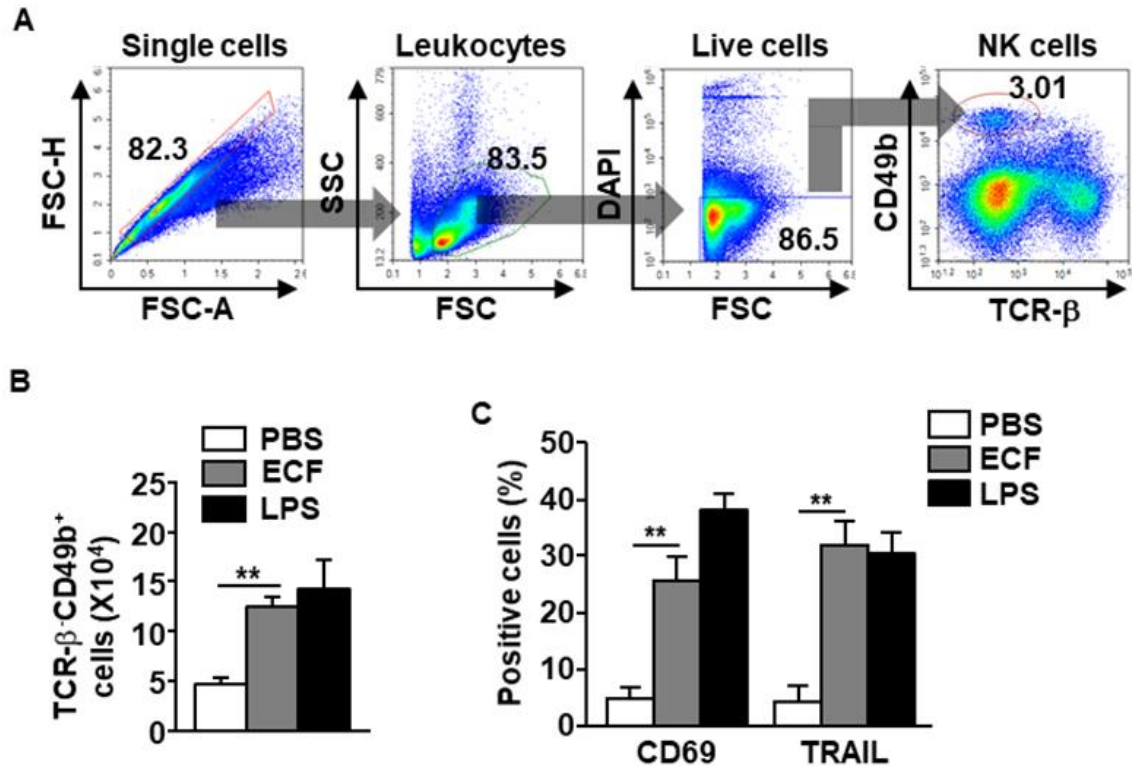

**Figure S4:** ECF promoted NK cell activation in BALB/c mLN. (A) Definition of NK cells in BALB/c mice are shown. (B) Average of NK cell number in the mLN ( $n = 6$ , two-way analysis of variance,  $**p < 0.01$ ). (C) CD69 and TRAIL expression levels in mLN NK cells are shown ( $n = 6$ , two-way analysis of variance,  $**p < 0.01$ ).

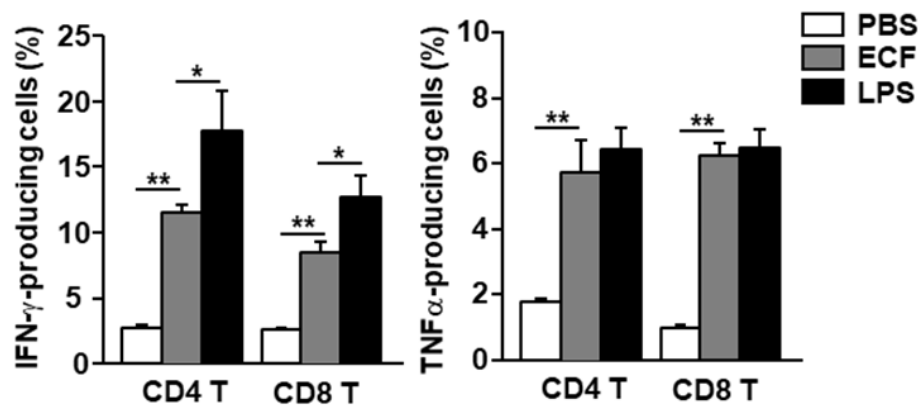

**Figure S5.** ECF induced Th1 and Tc1 immunity in mLN. BALB/c mice were *i.n.* administered 50 mg/kg ECF for twice 3 days interval and measured intracellular IFN- $\gamma$  (left panel) and TNF- $\alpha$  (right panel) producing levels in CD4 and CD8 T cells ( $n = 6$ , two-way analysis of variance,  $*p < 0.05$  and  $**p < 0.01$ ).
